# Supplementary material for: Wnt/β-catenin signaling is critical for regenerative potential of distal lung epithelial progenitor cells in homeostasis and emphysema
Source: PubMed Central journal article supplement — Stem Cells. Author manuscript; Available in PMC 2020 Dec 4. (PMC7116441; doi:10.1002/stem.3241), 2020-06-18
Supplement: EMS106927-supplement-Appendix_S1.pdf [file EMS106927-supplement-Appendix_S1.pdf]

## Supplemental Information

### **Wnt/ $\beta$ -catenin signaling alters distal lung epithelial progenitor cell phenotype and function in emphysema**

Authors: Yan Hu\*, John-Poul Ng-Blichfeldt\*, Chiharu Ota, Chiara Ciminieri, Wenhua Ren, Pieter S. Hiemstra, Jan Stolk, Reinoud Gosens, Melanie Königshoff

#### **1. Supplemental Methods and Material**

##### **Lung epithelial cell isolation**

Lungs of TCF:GFP mice of minimum 8-16 weeks old were flushed through the right heart with PBS, instilled with low-melt agarose (Sigma Aldrich, 9414), and dispase (Corning, 354235) and incubated at room temperature for 45 minutes. Trachea and extrapulmonary airways were removed. The remaining lobes were homogenized in DMEM containing DNase I (PanReac Applichem, A3778) to generate a single-cell suspension that was passed through 70 $\mu$ m and 40 $\mu$ m nylon filters. The single cell suspension was incubated with Microbeads conjugated to antibodies for CD45 (Miltenyi Biotec, 130-052-301) and CD31 (Miltenyi Biotec, 130-097-418), and passed through LS columns (Miltenyi Biotec, 130-091-051) to deplete hematopoietic and endothelial cells. The resultant suspension (CD31-CD45-) was enriched for epithelial cells by positive selection using Epcam (CD326) Microbeads (Miltenyi Biotec, 130-105-958).

##### **Fluorescence-activated cell sorting (FACS) according to EpCAM and GFP fluorescence**

The EpCAM<sup>+</sup>/CD31<sup>-</sup>/CD45<sup>-</sup> single cell suspension from TCF:GFP mouse lungs was prepared as described above. The suspension was stained with APC-conjugated anti-mouse EpCAM antibodies for 15 minutes at room temperature in the dark, washed with PBS, and resuspended in PBS containing 1% FBS and 25mM HEPES. GFP reporter activity in the EpCAM<sup>+</sup> population was assessed based on fluorescence intensity using FACSDiva software (BD Bioscience). The EpCAM<sup>+</sup> Wnt<sup>neg/low/high</sup> populations were sorted using a FACSria Fusion cell sorter (BD Bioscience), washed and centrifuged at 300 g for 10 minutes at 15°C, prior to organoid assay, or RNA isolation.

##### **Flow cytometric analysis**

EpCAM<sup>+</sup>/CD31<sup>-</sup>/CD45<sup>-</sup> cells were stained by APC-conjugated anti mouse EpCAM, PE-conjugated anti mouse CD24 (BioLegend, 138504) and APC-Cy7 conjugated anti mouse Sca-1 antibodies (BioLegend, 108126) or their respective isotype controls, APC rat IgG2a isotype control for EpCAM (BioLegend 400511), PE Rat IgG2c isotype control for CD24 (BioLegend, 400707) and APC/Cy7 Rat IgG2a isotype control for Sca-1 (BioLegend, 400524) for 15 mins at room temperature in dark. The cells were measure by FACS Fortessa cell analyzer (BD Bioscience) and analyzed using FACSDiva software (BD Bioscience).

### **Organoid culture**

Mlg ([MLg2908, CCL206], ATCC) cells at 90% confluence were proliferation-inactivated by incubation in culture medium containing mitomycin C (10µg/ml, Sigma #M4287) for 2 hours, followed by 3 washes in warm PBS, and recovery in culture media for >1 hour. Mlg were trypsinized and resuspended with equal numbers of freshly sorted distal lung epithelial cells in ice-cold DMEM. The cell suspension was mixed in equal volume of growth factor reduced Matrigel (Corning, 354263, diluted to 10mg/ml with sterile PBS). 100 µl of the cell-matrigel mix was added to each 0.4µm permeable insert for 24-well plate (Falcon 353095). 7,000 sorted EpCAM+Wnt<sup>neg/low/high</sup> and 7,000 Mlg cells per well were used for treatments with Wnt inhibitor and activators. For quantification of Ki67 cells and IF for cell markers, 20,000 epithelial and 20,000 Mlg cells per well were used. The mixture was incubated at 37°C for 20 minutes to solidify. Cultures were maintained in DMEM/F12 (Gibco, 11330-032) containing 5% FBS, pen/strep (100 U/ml), 1% GlutaMax (Life Technologies, 35050-061), 1X amphotericin B (Gibco, 15290018), 1X insulin-transferrin-selenium (Gibco #51300-044), recombinant mouse EGF (0.025µg/ml, Sigma, SRP3196), Cholera toxin (0.1µg/ml, Sigma C8052), bovine pituitary extract (30µg/ml, Sigma, P1476), and freshly added all-trans retinoic acid (0.01µM, Sigma, R2625). Y-27632 (10 µM, Tocris, 1254) was added for the first 48 hours of culture to prevent anoikis. Media was refreshed every 2-3 days. iCRT14 (10µM, Tocris, 4299) and CHIR99021 (2µM, Tocris, 4423) were used to manipulate Wnt/β-catenin signaling *in vitro*. Stock solution in dimethyl sulfoxide (DMSO) were stored at -20°C. Prior to treatments, all compounds were further diluted in DMSO so that the volume added to culture was equal across treatment groups. The same volume of DMSO was added for vehicle control.

### **Immunofluorescence on organoids**

Inserts containing Matrigel-organoid cultures were transferred to fresh 24-well plates, washed once underneath with PBS, fixed with ice cold acetone/methanol (1:1) for 15 minutes at -20°C, then washed again with PBS and

blocked in 5% (w/v) bovine serum albumin (BSA, Sigma) in PBS. Whole-mount immunofluorescence was performed with antibodies diluted in PBS with 0.1% (w/v) BSA, 0.1% Triton-X100. Cultures were incubated with primary antibodies at 4°C overnight, washed 3x in PBS for 15 minutes each, incubated with secondary antibodies at 4°C overnight, then incubated with DAPI as counterstain. For results in Figure 3C-D and Figure 4C-D and G, organoids were imaged within the culture plate using a Cytation1 Cell Imaging Multi-Mode Reader (BioTek), and images were obtained and analyzed with Gen5 Image+ software (BioTek). For results in Figure S3A, 4E-F, S4A, organoid cultures were excised from the inserts and mounted on glass slides with fluorescent mounting media (Dako, S3023) and glass coverslips. Immunofluorescence was visualized using a Zeiss LSM710 confocal microscope (Carl Zeiss, Germany). Images were obtained with ZEN2009 software (Carl Zeiss) or imported into Imaris 7.6.5 or 8.0.0 software (Bitplane, Zurich, Switzerland) for analysis. Antibodies used, with concentrations, are summarized in the table below.

### **Immunofluorescence on tissue sections and cytopins**

To generate lung tissue sections, mice were anaesthetized and sacrificed, and lungs were flushed through the heart with PBS. Lungs were instilled with OCT/PBS (1:1) and frozen on liquid nitrogen. For staining, 10µm cryosections were fixed with ice cold acetone/methanol (1:1) for 15 minutes at -20°C, blocked for 2 hours with 5% BSA in PBS, then incubated with primary antibodies at 4°C overnight, washed 3x in PBS, and incubated with secondary antibodies at room temperature for 2 hours. Sections were mounted with fluorescent mounting media containing DAPI (Abcam, 104139) and glass coverslips.

To generate cytopins, glass slides were pre-coated with BSA, and lung EpCAM+ cells were centrifuged at 450 rpm for 6 minutes. Slides were processed for staining as for tissue sections. Immunofluorescence was visualized using a Zeiss LSM710 (Carl Zeiss) or Leica SP8 (Leica) confocal microscope. Images were obtained with ZEN2009 (Carl Zeiss) or LASX (Leica) software or imported into Imaris 7.6.5 or 8.0.0 software (Bitplane, Zurich, Switzerland) for analysis. Secondary antibody specificity was confirmed by absence of signal in control samples stained without primary antibody.

### **Primary antibodies**

| <b>Antibody</b> | <b>Host species (Isotype)</b> | <b>Company, Catalog number</b> | <b>Concentration used</b> |
|-----------------|-------------------------------|--------------------------------|---------------------------|
| SFTPC           | Rabbit                        | Millipore, AB3786              | 1:200                     |
| CC10            | Mouse (IgG1)                  | Santa Cruz, sc-365992          | 1:50                      |

|                     |               |                           |        |
|---------------------|---------------|---------------------------|--------|
| E-cadherin          | Mouse         | BD, 610182                | 1:200  |
| Acetylated tubulin  | Mouse (IgG2b) | Abcam, ab24610            | 1:2000 |
| Ki67                | Rat           | Dako/Agilent, M7248       | 1:200  |
| Zo-1                | Rabbit        | Thermo Fisher, 40-2200    | 1:100  |
| GFP-Alexa fluor 488 | Rabbit        | Molecular Probes, A-21311 | 1:200  |

### Secondary antibodies

| Antibody                    | Host species | Company, Catalog number | Concentration used |
|-----------------------------|--------------|-------------------------|--------------------|
| Anti-mouse-Alexa Fluor 647  | Goat         | Abcam, ab150107         | 1:200              |
| Anti-mouse-Alexa Fluor 488  | Goat         | Thermo Fisher, A-11011  | 1:200              |
| Anti-rabbit-Alexa Fluor 647 | Goat         | Abcam, ab150079         | 1:200              |
| Anti-rabbit-Alexa Fluor 555 | Goat         | Thermo Fisher, A-21429  | 1:200              |
| Anti-rabbit-Alexa Fluor 488 | Goat         | Thermo Fisher, A-11055  | 1:200              |

### Quantitative real-time polymerase chain reaction (qRT-PCR)

RNA was extracted directly from FACS sorted cells using a RNeasy Micro Kit (Qiagen, 74004) according to the manufacturer's instructions. cDNA synthesis was performed with 100ng of RNA using SuperScript II (Life Technologies). qRT-PCR was performed using SYBR green and the QuantStudio 7 Flex system (Applied Biosystems by Life Technologies). Hypoxanthine guanine phosphoribosyl transferase (Hprt) gene was used as a reference gene in all qRT-PCR reactions. Statistics were performed on  $\Delta Ct$  values ( $\Delta Ct = Ct^{\text{reference}} - Ct^{\text{target}}$ ).

Primers used are listed in table below:

| Gene name | Forward primer         | Reverse primer           |
|-----------|------------------------|--------------------------|
| Hprt      | CCTAAGATGAGCGCAAGTTGAA | CCACAGGACTAGAACACCTGCTAA |
| Egfp      | ATGGCCGACAAGCAGAAGAA   | CTCAGGTAGTGGTTGTCTGGG    |
| Sftpb     | ATCCCAAGGGTGTGCTG      | GTGCGTCTAGCAGGAGAACT     |
| sftpd     | ATAGCCGAGCCTGACAAACA   | GAAAGGGCAGCATGTCAGATTG   |
| Scgb1a1   | CAGACACCAAAGCCTCCAAC   | CAGATGTCCGAAGAAGCTGAG    |
| Foxj1     | TTGACTGGGAGGCCATCTTT   | GTAGCAGGGCAGTTGATGTG     |
| Muc5ac    | TTCGTGTGGAACGAGGATGA   | TGGATTTTGGACTGCCGTTG     |

|       |                       |                      |
|-------|-----------------------|----------------------|
| Muc5b | AGGGTCAGGCAGAGCTGA    | TGTAAGGCGCTCATGCTAGG |
| Itgb4 | CAAGTCCAACCTCAGCAACCC | CTCCTGTCCGTTTCATCGAG |

## 2. Supplemental Figures and Figure Legends

### A Magnetic bead isolation of lung epithelial cell

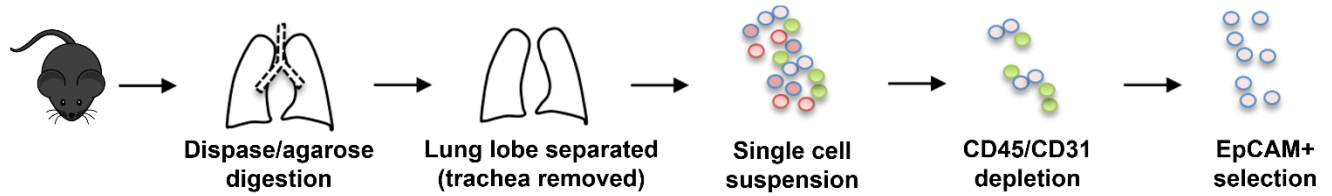

### Supplemental figures S1, related to Figure 1

A. Schematic of magnetic bead separation method to isolate EpCAM+ cells from adult distal mouse lung.

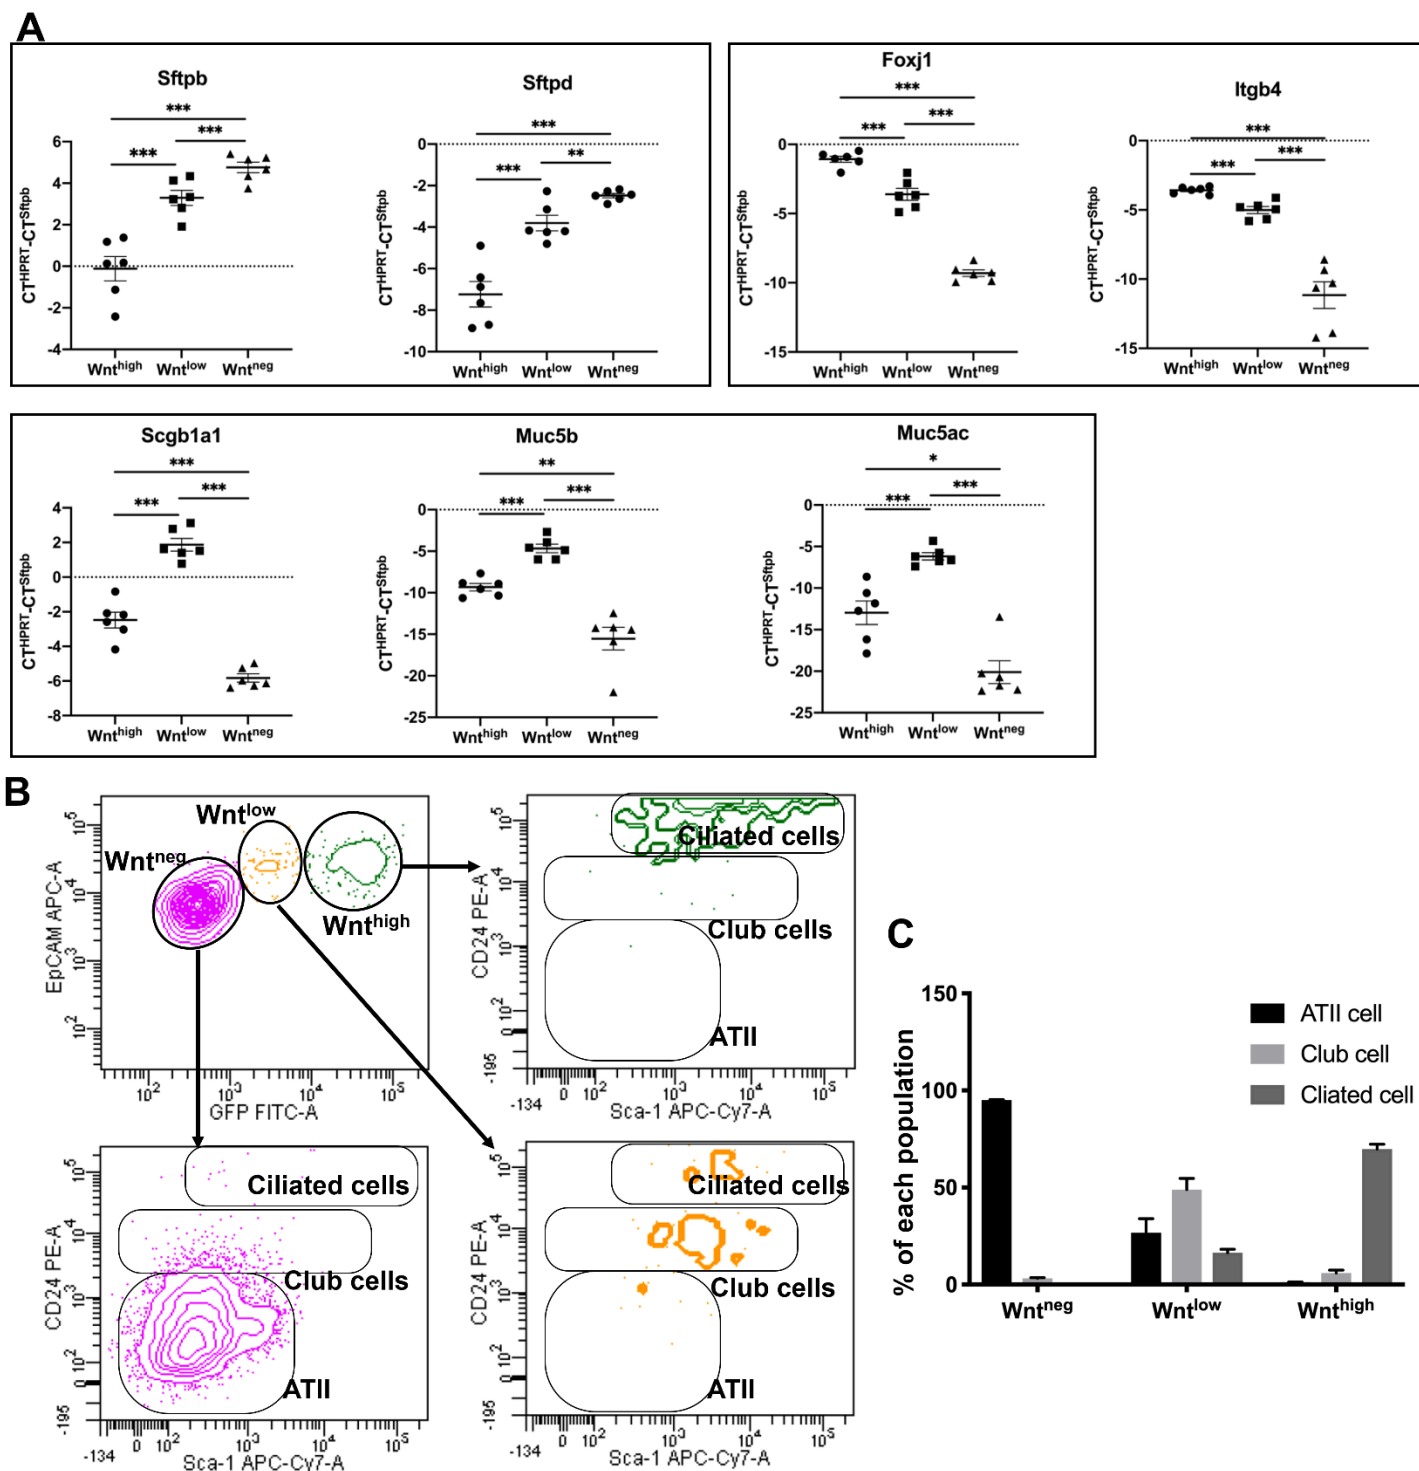

**Supplemental figures S2, related to Figure 2**

A) RT-PCR validation of epithelial cell markers in freshly sorted Wnt<sup>neg/low/high</sup> cells from the lung of TCF:GFP mice (N=6). Statistics was performed on  $\Delta CT$  values ( $\Delta CT = CT^{HPRT} - CT^{target}$ ). \*  $p < 0.05$ , \*\*  $p < 0.01$ , \*\*\*  $p < 0.001$ , Student T test. . B-C) Flow cytometry analysis of the expressions of CD24 and Sca-1 in Wnt<sup>neg/low/high</sup> cells and quantification (C) of the percentages of CD24<sup>neg</sup>/Sca-1<sup>neg</sup> ATII cells, the CD24<sup>low</sup>/Sca-1<sup>+</sup> club cells and CD24<sup>high</sup>/Sca-1<sup>+</sup> ciliated cells in the three populations. Data shown is Mean $\pm$ SEM. N=4 individual animals.

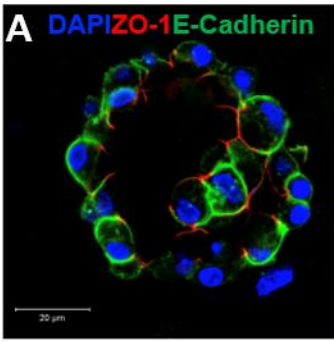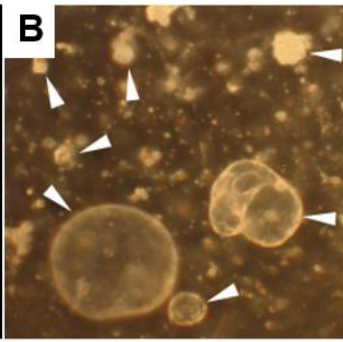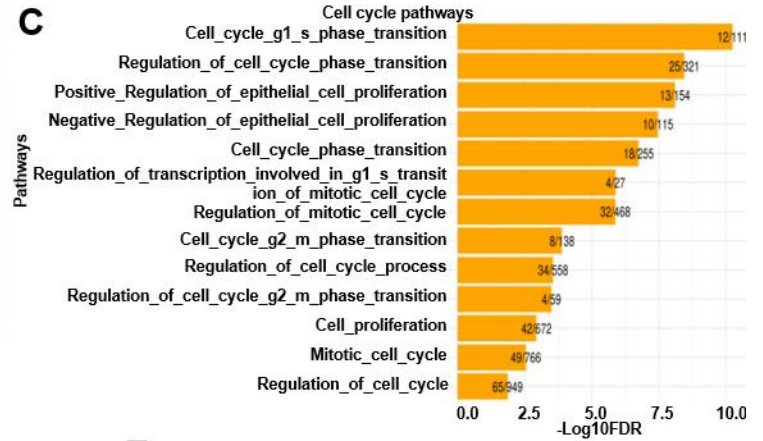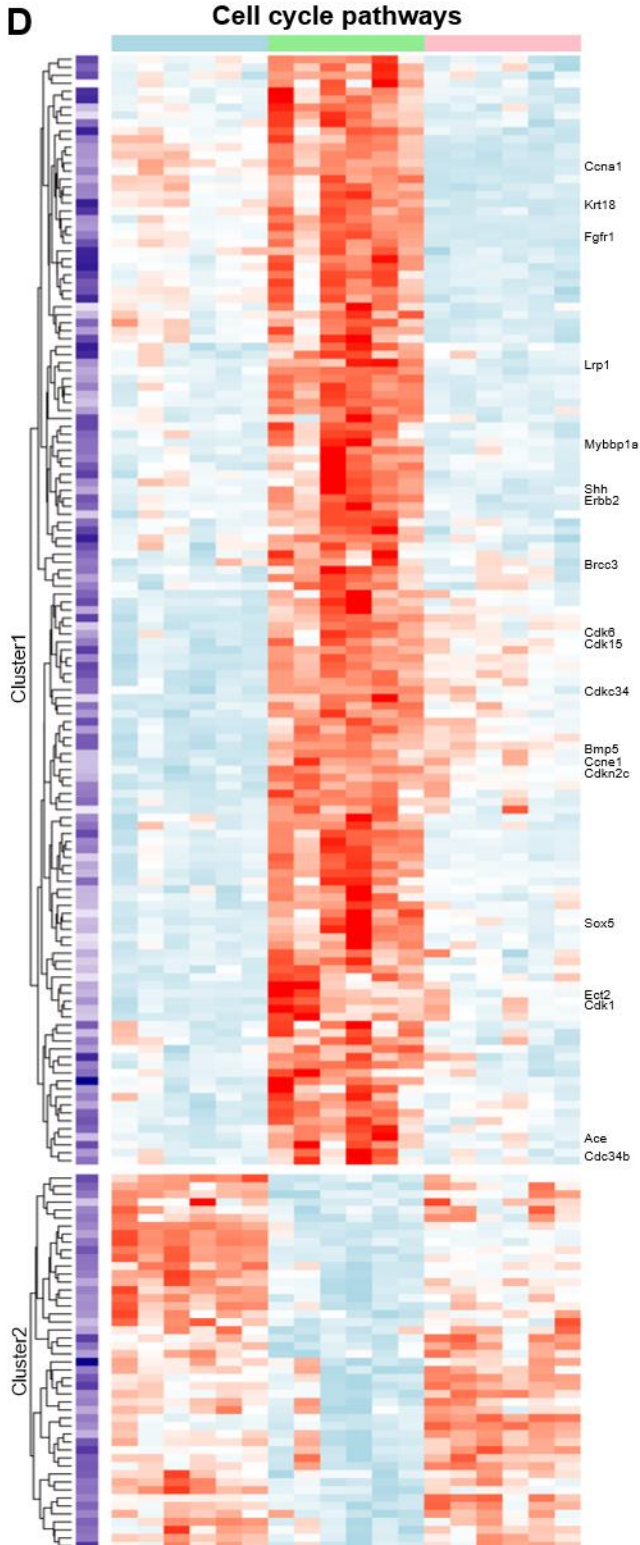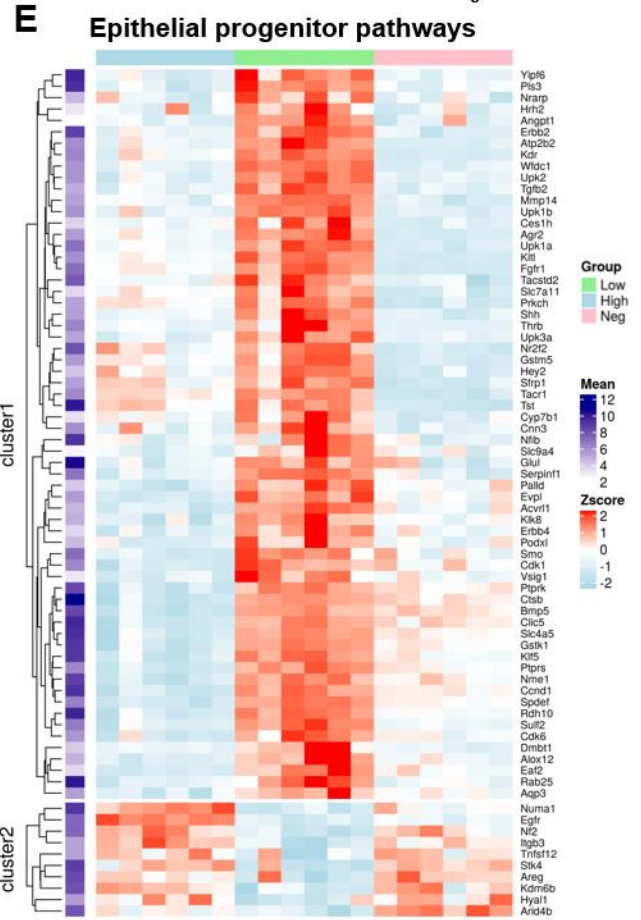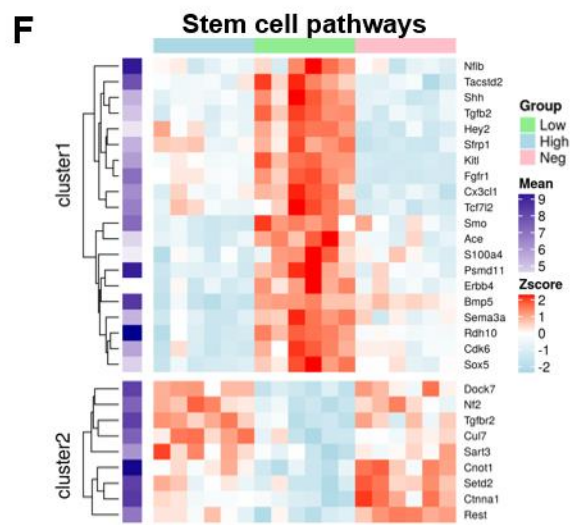

**Supplemental Figure S3, related to Figure 3** A) Whole-mount immunofluorescence staining of day 14 organoid showing a lumen enclosed by ZO-1<sup>+</sup> (in red) and E-Cadherin<sup>+</sup> (in green) epithelial cells. Nuclei are stained with DAPI in blue. Scale bar, 20  $\mu$ m. B) Representative image of organoids at day 28 indicating heterogeneity in size and shape (arrowheads). C) Pathways enriched in the Wnt<sup>low</sup> cells related to cell cycle. Plotted values are  $-\text{Log}_{10}\text{FDR}$ . Data shown on the right end of the bars: the numbers of significantly changed genes (both Wnt<sup>low</sup> vs Wnt<sup>neg</sup> and Wnt<sup>low</sup> vs Wnt<sup>high</sup>)/ total number of genes in each pathway. D-F) Heatmaps show enrichment of genes (FDR<0.05) in cell cycle (D), epithelial progenitor (E), and stem cell (F) pathways in the Wnt<sup>low</sup> cells.



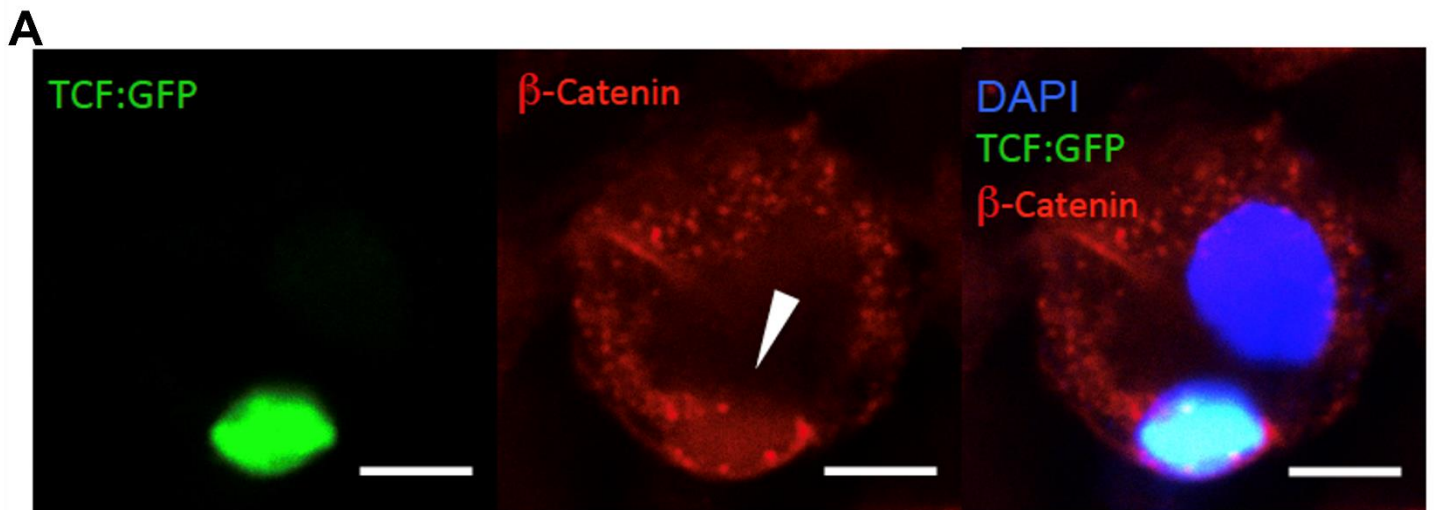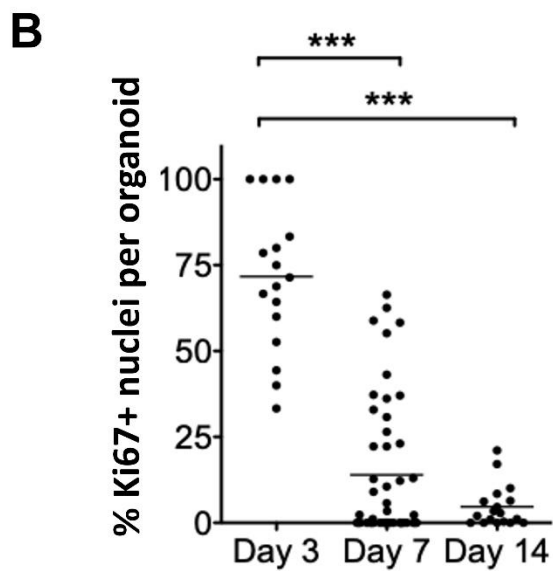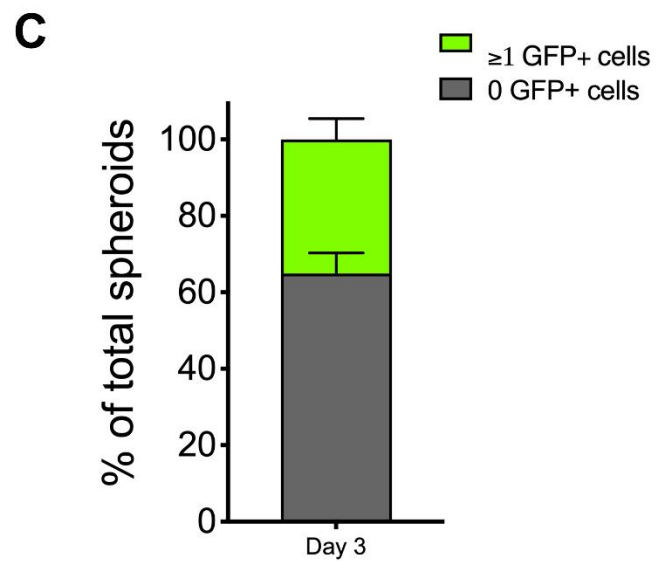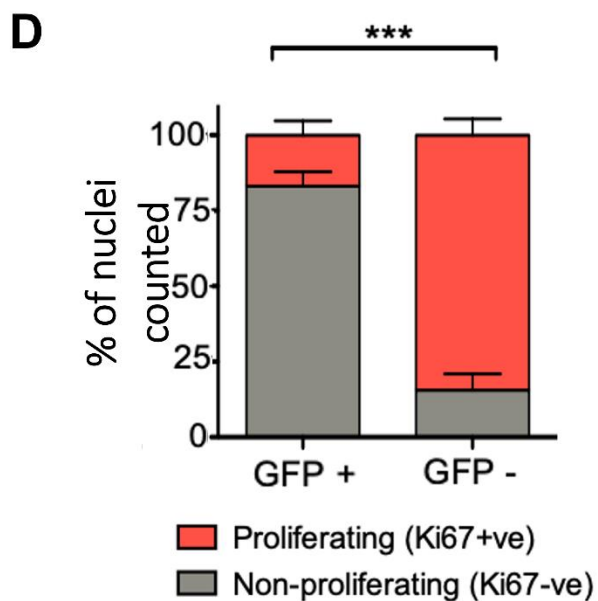

**Supplemental figures S4, related to Figure 4** A) Whole-mount immunofluorescence (IF) for  $\beta$ -catenin (red) and GFP (green) in organoids at day 3. Nuclear  $\beta$ -catenin was observed in GFP<sup>+</sup> cells (white arrowhead). Scale

bar, 5 $\mu$ m. B) Percentage of Ki67<sup>+</sup> cells per organoid at days 3, 7 and 14. Data points represent individual organoids, horizontal lines represent median \*\*\*p<0.001, Kruskal-Wallis with Dunn's post-test (n=17-49 organoids, N=3). C) Quantification of GFP<sup>+</sup> cells in organoids at day 3 (N=3, >500 organoids counted in total). Mean  $\pm$  SEM. D) Quantification of Ki67 co-staining in GFP<sup>+</sup> cells (106 counted) or GFP<sup>-</sup> cells (720 counted) within organoids at day 3 (N=3). Mean  $\pm$  SEM. \*\*\*p<0.001, unpaired t-test.

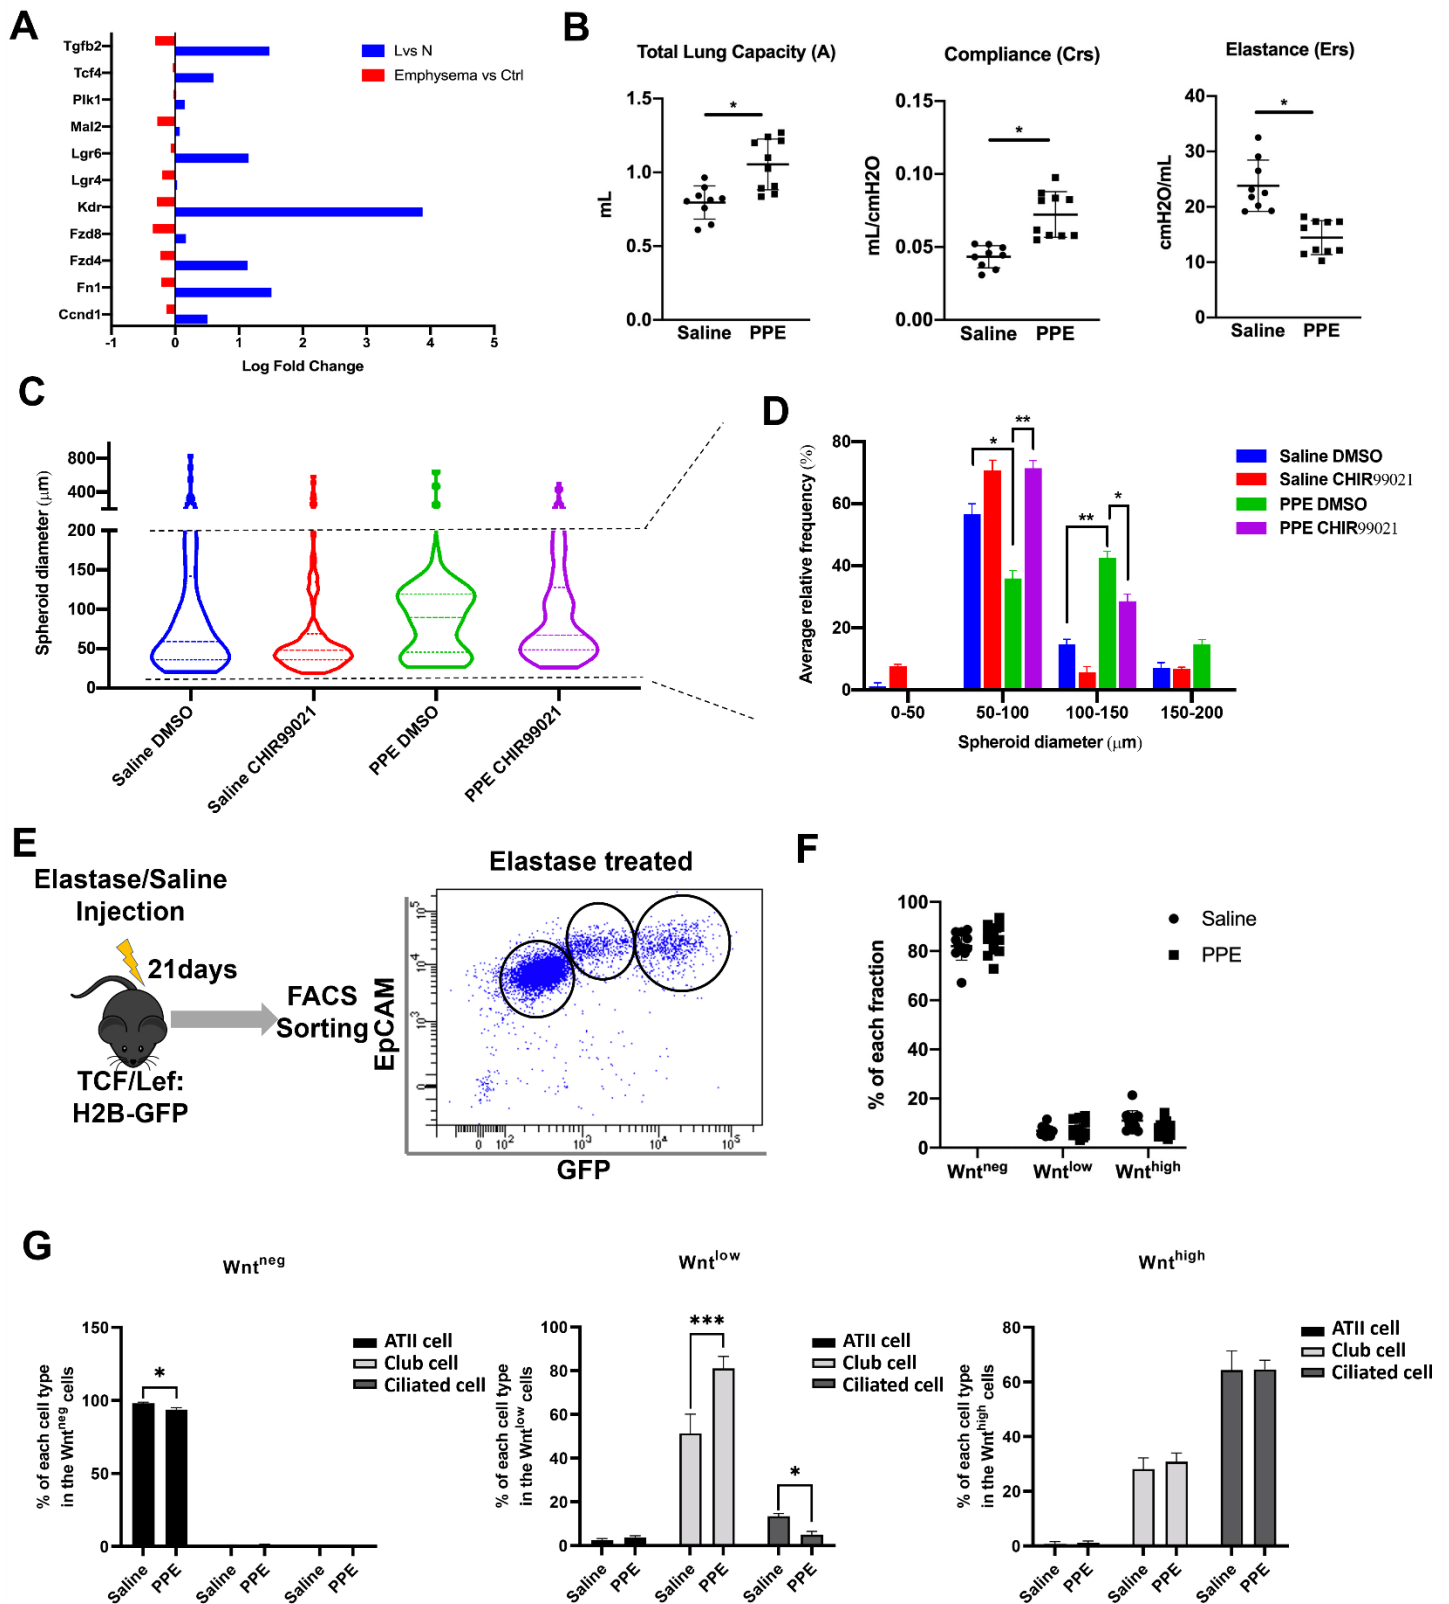

**Supplemental Figure 5, related to Figure 5.** A) Genes related to Wnt/ $\beta$ -catenin signaling that are up-regulated in  $Wnt^{low}$  cells (compared to  $Wnt^{neg}$  cells,  $p > 0.05$ ) but down-regulated in emphysematous human lung (compared to healthy donor lungs,  $p > 0.05$ ). B) Lung function analysis of PPE and saline treated TCF:GFP mice showed

that the PPE treated lungs showed significant increase of the total lung capacity (A, ml) and compliance (Crs, ml/cmH<sub>2</sub>O) but reduced elastance (Ers, cmH<sub>2</sub>O/ml). C) Violin plot of organoid diameters (Feret's diameter,  $\mu$ m) measured at day 14 (n > 120 organoids, N=3 animals per treatment). D) Histogram of the average percentage of organoids with diameter from 0 to 200 $\mu$ m shown in F. Bin=50  $\mu$ m. Data presented as mean $\pm$ SEM. \*p<0.05, \*\*p<0.01, unpaired student's t test using the Holm-Sidak method. E) Schematic of PPE/saline treatment to the TCF/Lef:H2B-GFP mice and gating strategy for FACS sorting EpCAM+ Wnt<sup>neg/low/high</sup> fractions from elastase treated mouse lungs. F) The percentages of Wnt<sup>neg/low/high</sup> fractions in total epithelial population after PPE treatment were not changed. N=8, individual animals of each treatment.

### 3. Supplemental Tables

**Supplemental Table 1. Wnt<sup>low</sup> cells enriched genes that are down-regulated in COPD.**

|    | MGI symbol | HGNC symbol | logFC Emphysema vs Healthy | adj.P.Val | logFC. Low vs High | adj.P.Val. Low vs High | logFC.Low vs Neg | adj.P.Val. Low vs Neg |
|----|------------|-------------|----------------------------|-----------|--------------------|------------------------|------------------|-----------------------|
| 1  | Ace2       | ACE2        | -0.52                      | 3.70E-03  | 2.74               | 7.10E-06               | 2.17             | 1.10E-04              |
| 2  | Acp5       | ACP5        | -0.43                      | 3.10E-02  | 0.98               | 6.80E-07               | 0.71             | 1.30E-05              |
| 3  | Adra2a     | ADRA2A      | -0.48                      | 2.40E-04  | 0.26               | 7.10E-03               | 0.42             | 1.80E-04              |
| 4  | Ak3        | AK3         | -0.21                      | 2.20E-02  | 0.41               | 1.20E-04               | 0.55             | 9.50E-06              |
| 5  | Aldh18a1   | ALDH18A1    | -0.57                      | 5.90E-05  | 0.2                | 1.40E-02               | 0.49             | 7.10E-06              |
| 6  | Amdhd1     | AMDHD1      | -0.53                      | 1.70E-02  | 0.44               | 2.70E-04               | 0.34             | 3.30E-03              |
| 7  | Aqp11      | AQP11       | -0.51                      | 1.40E-03  | 0.82               | 5.70E-04               | 1.71             | 4.00E-07              |
| 8  | Arf4       | ARF4        | -0.38                      | 4.90E-02  | 0.47               | 6.20E-06               | 0.3              | 7.70E-04              |
| 9  | Arhgap24   | ARHGAP24    | -0.58                      | 6.40E-03  | 1.03               | 2.20E-05               | 0.97             | 6.40E-05              |
| 10 | Atp6v0a2   | ATP6V0A2    | -0.28                      | 3.00E-03  | 0.3                | 9.90E-05               | 0.2              | 4.10E-03              |
| 11 | Brcc3      | BRCC3       | -0.27                      | 4.60E-02  | 0.17               | 3.00E-02               | 0.15             | 4.60E-02              |
| 12 | C1qbp      | C1QBP       | -0.2                       | 2.80E-02  | 0.29               | 1.80E-04               | 0.32             | 9.50E-05              |
| 13 | Ccdc115    | CCDC115     | -0.27                      | 4.10E-03  | 0.45               | 2.90E-03               | 0.3              | 3.50E-02              |
| 14 | Ccdc51     | CCDC51      | -0.35                      | 7.30E-03  | 0.38               | 2.50E-05               | 0.24             | 2.10E-03              |
| 15 | Ccne1      | CCNE1       | -0.39                      | 2.10E-02  | 0.79               | 4.70E-06               | 0.25             | 4.80E-02              |
| 16 | Cd14       | CD14        | -0.33                      | 2.60E-02  | 1.32               | 8.70E-06               | 1.08             | 9.20E-05              |
| 17 | Cdca7l     | CDCA7L      | -0.35                      | 3.20E-02  | 0.32               | 6.40E-04               | 0.21             | 1.50E-02              |
| 18 | Cdkn2c     | CDKN2C      | -0.47                      | 2.10E-02  | 0.59               | 3.10E-06               | 0.29             | 2.80E-03              |
| 19 | Cenpl      | CENPL       | -0.37                      | 2.40E-02  | 0.33               | 9.40E-05               | 0.23             | 3.10E-03              |
| 20 | Cfb        | CFB         | -0.39                      | 2.20E-02  | 1.83               | 3.20E-04               | 3.02             | 3.00E-06              |
| 21 | Chad       | CHAD        | -0.26                      | 4.90E-02  | 3.11               | 1.10E-05               | 5.54             | 2.00E-08              |
| 22 | Chn2       | CHN2        | -0.69                      | 2.70E-04  | 0.58               | 3.50E-03               | 1.97             | 1.50E-08              |
| 23 | Cisd1      | CISD1       | -0.2                       | 3.00E-03  | 0.29               | 1.60E-02               | 1.16             | 3.20E-08              |
| 24 | Cldn10     | CLDN10      | -0.67                      | 1.10E-02  | 1.76               | 2.70E-05               | 3.56             | 1.30E-08              |
| 25 | Clint1     | CLINT1      | -0.22                      | 1.70E-02  | 0.65               | 7.80E-07               | 0.25             | 4.50E-03              |

|    |         |         |       |          |      |          |      |          |
|----|---------|---------|-------|----------|------|----------|------|----------|
| 26 | Clptm1l | CLPTM1L | -0.23 | 1.70E-02 | 0.27 | 5.30E-05 | 0.19 | 2.00E-03 |
| 27 | Clstn3  | CLSTN3  | -0.53 | 3.60E-03 | 0.51 | 1.70E-05 | 0.34 | 1.10E-03 |
| 28 | Cmas    | CMAS    | -0.22 | 4.40E-03 | 0.29 | 1.60E-02 | 0.81 | 2.00E-06 |
| 29 | Cmtm7   | CMTM7   | -0.37 | 3.40E-02 | 0.46 | 4.30E-03 | 1.25 | 3.00E-07 |
| 30 | Copb2   | COPB2   | -0.15 | 3.20E-02 | 0.36 | 1.10E-04 | 0.25 | 3.20E-03 |
| 31 | Cops4   | COPS4   | -0.16 | 2.00E-02 | 0.18 | 1.20E-02 | 0.34 | 7.20E-05 |
| 32 | Creld1  | CRELD1  | -0.42 | 2.40E-02 | 0.31 | 8.60E-04 | 0.19 | 2.90E-02 |
| 33 | Ctsb    | CTSB    | -0.57 | 2.70E-04 | 0.93 | 6.30E-07 | 0.28 | 1.70E-02 |
| 34 | Ctsf    | CTSF    | -0.17 | 4.40E-02 | 0.49 | 4.80E-05 | 0.45 | 1.80E-04 |
| 35 | Cyp1b1  | CYP1B1  | -0.83 | 4.90E-04 | 1.37 | 3.60E-05 | 1.75 | 4.30E-06 |
| 36 | Ddi2    | RSC1A1  | -0.48 | 6.40E-03 | 0.49 | 1.60E-03 | 0.76 | 3.80E-05 |
| 37 | Eaf2    | EAF2    | -0.54 | 3.70E-03 | 0.76 | 2.70E-06 | 0.41 | 1.10E-03 |
| 38 | Ears2   | EARS2   | -0.29 | 8.70E-03 | 0.29 | 7.40E-03 | 0.31 | 5.80E-03 |
| 39 | Eif2b1  | EIF2B1  | -0.32 | 8.50E-04 | 0.27 | 1.10E-03 | 0.18 | 2.00E-02 |
| 40 | Eif3f   | EIF3F   | -0.2  | 2.10E-03 | 0.76 | 8.70E-07 | 0.21 | 4.00E-02 |
| 41 | Eif3i   | EIF3I   | -0.21 | 1.50E-02 | 0.33 | 2.90E-05 | 0.21 | 2.30E-03 |
| 42 | Ephb2   | EPHB2   | -0.5  | 2.70E-03 | 0.76 | 1.80E-06 | 0.69 | 5.50E-06 |
| 43 | Eprs    | EPRS    | -0.22 | 2.50E-04 | 0.46 | 1.20E-05 | 0.17 | 4.00E-02 |
| 44 | Fmo2    | FMO2    | -0.33 | 3.60E-02 | 2.47 | 9.90E-06 | 3.12 | 1.20E-06 |
| 45 | Fntb    | FNTB    | -0.31 | 6.00E-04 | 0.21 | 7.50E-03 | 0.2  | 1.30E-02 |
| 46 | Fundc2  | FUNDC2  | -0.46 | 1.10E-03 | 0.42 | 8.00E-05 | 0.24 | 9.70E-03 |
| 47 | Fyco1   | FYCO1   | -0.21 | 5.10E-03 | 0.57 | 3.40E-05 | 0.31 | 8.10E-03 |
| 48 | Ghitm   | GHITM   | -0.15 | 6.60E-03 | 0.19 | 1.20E-02 | 0.34 | 1.30E-04 |
| 49 | Gjb2    | GJB2    | -0.71 | 4.20E-02 | 1.5  | 4.80E-07 | 0.61 | 1.40E-03 |
| 50 | Gltp    | GLTP    | -0.14 | 1.30E-02 | 1.09 | 5.80E-07 | 0.5  | 6.70E-04 |
| 51 | Gpi1    | GPI     | -0.35 | 1.00E-03 | 0.35 | 1.10E-04 | 0.23 | 5.80E-03 |
| 52 | Gss     | GSS     | -0.27 | 1.50E-02 | 0.78 | 1.40E-04 | 1.2  | 2.60E-06 |
| 53 | Gstk1   | GSTK1   | -0.26 | 7.30E-04 | 1.83 | 7.60E-07 | 0.83 | 1.30E-03 |
| 54 | Gsto1   | GSTO1   | -0.31 | 1.90E-02 | 0.76 | 2.60E-04 | 3.66 | 9.10E-12 |
| 55 | Gusb    | GUSB    | -0.28 | 3.30E-03 | 0.61 | 3.60E-06 | 0.43 | 1.70E-04 |
| 56 | Hexb    | HEXB    | -0.22 | 2.50E-02 | 1.08 | 2.80E-06 | 0.55 | 2.10E-03 |
| 57 | Hp      | HP      | -0.75 | 3.90E-02 | 0.73 | 6.00E-06 | 0.92 | 6.40E-07 |
| 58 | Hspa9   | HSPA9   | -0.22 | 1.30E-03 | 0.39 | 5.60E-05 | 0.22 | 8.20E-03 |
| 59 | Htra2   | HTRA2   | -0.27 | 8.60E-03 | 0.3  | 3.90E-03 | 0.3  | 4.20E-03 |
| 60 | Hyls1   | HYLS1   | -0.5  | 1.00E-04 | 0.4  | 1.50E-02 | 0.41 | 1.20E-02 |
| 61 | Ikzf3   | IKZF3   | -0.56 | 3.30E-03 | 0.29 | 6.30E-03 | 0.3  | 6.20E-03 |
| 62 | Imp4    | IMP4    | -0.2  | 3.60E-02 | 0.24 | 5.80E-03 | 0.17 | 4.20E-02 |
| 63 | Lipa    | LIPA    | -0.51 | 3.70E-03 | 0.75 | 1.20E-05 | 0.63 | 1.10E-04 |
| 64 | Lrp1    | LRP1    | -0.39 | 2.90E-03 | 0.78 | 6.70E-05 | 0.92 | 2.10E-05 |
| 65 | Lrrc28  | LRRC28  | -0.4  | 7.70E-03 | 0.49 | 4.30E-04 | 0.53 | 2.70E-04 |
| 66 | Ltv1    | LTV1    | -0.25 | 1.80E-04 | 0.45 | 2.70E-05 | 0.29 | 2.00E-03 |
| 67 | M6pr    | M6PR    | -0.27 | 4.20E-02 | 0.3  | 3.20E-04 | 0.17 | 2.20E-02 |
| 68 | Man1c1  | MAN1C1  | -0.38 | 9.90E-03 | 1.58 | 7.70E-07 | 0.7  | 1.70E-03 |
| 69 | Mcoln2  | MCOLN2  | -0.39 | 6.00E-03 | 0.28 | 9.90E-04 | 0.27 | 2.00E-03 |

|     |         |         |       |          |      |          |      |          |
|-----|---------|---------|-------|----------|------|----------|------|----------|
| 70  | Metap2  | METAP2  | -0.1  | 3.70E-02 | 0.39 | 2.60E-06 | 0.22 | 1.00E-03 |
| 71  | Mettl1  | METTL1  | -0.29 | 3.80E-02 | 1.43 | 7.50E-07 | 0.43 | 2.20E-02 |
| 72  | Mgst2   | MGST2   | -0.16 | 4.40E-02 | 1.08 | 1.60E-05 | 1.98 | 2.20E-08 |
| 73  | Mia3    | MIA3    | -0.85 | 6.70E-05 | 0.24 | 2.10E-02 | 0.44 | 2.20E-04 |
| 74  | Mid1    | MID1    | -0.33 | 3.90E-02 | 0.43 | 1.10E-03 | 0.46 | 7.90E-04 |
| 75  | Mmachc  | MMACHC  | -0.53 | 2.20E-03 | 0.37 | 4.20E-04 | 0.36 | 7.00E-04 |
| 76  | Mmp14   | MMP14   | -0.42 | 1.00E-02 | 0.46 | 5.60E-06 | 0.61 | 3.20E-07 |
| 77  | Mpi     | MPI     | -0.38 | 2.10E-03 | 0.26 | 1.20E-03 | 0.31 | 3.20E-04 |
| 78  | Mrpl12  | MRPL12  | -0.32 | 7.90E-03 | 0.26 | 1.90E-03 | 0.17 | 3.30E-02 |
| 79  | Msc     | MSC     | -0.82 | 2.20E-02 | 0.42 | 3.40E-04 | 0.27 | 1.20E-02 |
| 80  | Ndufa1  | NDUFA1  | -0.19 | 1.50E-02 | 0.42 | 1.10E-04 | 0.46 | 6.90E-05 |
| 81  | Ndufa3  | NDUFA3  | -0.27 | 6.00E-03 | 0.34 | 1.10E-04 | 0.18 | 1.70E-02 |
| 82  | Ndufa9  | NDUFA9  | -0.32 | 1.30E-03 | 0.25 | 6.40E-04 | 0.16 | 1.90E-02 |
| 83  | Ndufv3  | NDUFV3  | -0.48 | 1.10E-03 | 0.37 | 6.50E-04 | 0.25 | 1.20E-02 |
| 84  | Nfu1    | NFU1    | -0.19 | 1.90E-02 | 0.25 | 4.10E-03 | 0.2  | 1.70E-02 |
| 85  | Noc2l   | NOC2L   | -0.31 | 3.10E-02 | 0.2  | 7.90E-03 | 0.22 | 5.20E-03 |
| 86  | Nop10   | NOP10   | -0.2  | 3.10E-02 | 0.28 | 1.10E-03 | 0.23 | 5.90E-03 |
| 87  | Nufip1  | NUFIP1  | -0.41 | 1.50E-02 | 0.25 | 3.20E-02 | 0.3  | 9.90E-03 |
| 88  | Pcx     | PC      | -0.51 | 2.50E-02 | 1.72 | 1.80E-06 | 1.11 | 1.80E-04 |
| 89  | Pdxdc1  | PDXDC1  | -0.22 | 3.30E-03 | 0.42 | 2.50E-05 | 0.27 | 2.00E-03 |
| 90  | Phlpp1  | PHLPP1  | -0.36 | 4.90E-02 | 0.28 | 4.50E-03 | 0.42 | 2.00E-04 |
| 91  | Pinx1   | PINX1   | -0.51 | 1.20E-03 | 0.65 | 4.60E-05 | 0.37 | 7.80E-03 |
| 92  | Pmm2    | PMM2    | -0.33 | 6.00E-03 | 0.51 | 7.40E-06 | 0.38 | 2.10E-04 |
| 93  | Pmpcb   | PMPCB   | -0.12 | 3.20E-02 | 0.16 | 9.20E-03 | 0.14 | 2.80E-02 |
| 94  | Polr1e  | POLR1E  | -0.33 | 1.10E-03 | 0.74 | 1.10E-06 | 0.32 | 3.40E-03 |
| 95  | Pou2af1 | POU2AF1 | -1.33 | 6.70E-05 | 0.55 | 5.10E-06 | 0.33 | 9.50E-04 |
| 96  | Ppa1    | PPA1    | -0.22 | 6.10E-03 | 0.79 | 1.60E-06 | 0.58 | 4.30E-05 |
| 97  | Psat1   | PSAT1   | -0.76 | 3.50E-03 | 0.3  | 6.30E-04 | 0.17 | 3.00E-02 |
| 98  | Psmb1   | PSMB1   | -0.16 | 1.40E-03 | 0.3  | 4.50E-04 | 0.41 | 2.70E-05 |
| 99  | Psmb10  | PSMB10  | -0.19 | 4.30E-02 | 0.75 | 2.80E-06 | 0.33 | 6.70E-03 |
| 100 | Psmb3   | PSMB3   | -0.16 | 3.40E-02 | 0.39 | 1.20E-02 | 0.52 | 1.70E-03 |
| 101 | Psmb4   | PSMB4   | -0.26 | 5.00E-04 | 0.25 | 1.60E-03 | 0.37 | 5.70E-05 |
| 102 | Psmb7   | PSMB7   | -0.2  | 3.40E-02 | 0.25 | 1.90E-03 | 0.3  | 5.00E-04 |
| 103 | Psmd1   | PSMD1   | -0.28 | 8.60E-04 | 0.45 | 1.80E-05 | 0.41 | 6.90E-05 |
| 104 | Pusl1   | PUSL1   | -0.5  | 1.40E-03 | 0.62 | 7.30E-07 | 0.16 | 4.90E-02 |
| 105 | Rasgrf1 | RASGRF1 | -0.73 | 2.90E-03 | 1.26 | 2.90E-06 | 1.05 | 2.50E-05 |
| 106 | Rit1    | RIT1    | -0.41 | 3.10E-03 | 0.24 | 9.90E-03 | 0.34 | 8.70E-04 |
| 107 | Rnf121  | RNF121  | -0.44 | 7.20E-04 | 0.29 | 4.80E-04 | 0.24 | 2.50E-03 |
| 108 | Rps21   | RPS21   | -0.22 | 5.00E-02 | 0.62 | 7.10E-06 | 0.34 | 2.20E-03 |
| 109 | Rspo1   | RSPO1   | -0.77 | 6.00E-03 | 0.59 | 3.50E-04 | 1.16 | 4.60E-07 |
| 110 | Saa3    | SAA1    | -0.86 | 2.80E-02 | 1.48 | 1.90E-03 | 0.93 | 3.70E-02 |
| 111 | Saal1   | SAAL1   | -0.21 | 1.10E-03 | 0.27 | 9.60E-04 | 0.15 | 4.40E-02 |
| 112 | Samd4   | SAMD4A  | -0.66 | 6.60E-03 | 1.55 | 1.70E-06 | 1.68 | 7.20E-07 |
| 113 | Shmt2   | SHMT2   | -0.26 | 6.90E-04 | 0.29 | 1.80E-03 | 0.38 | 2.30E-04 |

|     |          |          |       |          |      |          |      |          |
|-----|----------|----------|-------|----------|------|----------|------|----------|
| 114 | Sidt1    | SIDT1    | -0.42 | 4.10E-02 | 1.66 | 5.40E-06 | 2.11 | 5.10E-07 |
| 115 | Sil1     | SIL1     | -0.3  | 3.80E-02 | 0.49 | 1.80E-06 | 0.25 | 1.30E-03 |
| 116 | Slc22a18 | SLC22A18 | -0.33 | 1.80E-02 | 0.89 | 1.90E-05 | 1.09 | 3.40E-06 |
| 117 | Slc45a3  | SLC45A3  | -0.61 | 1.90E-03 | 0.43 | 1.40E-03 | 0.74 | 1.10E-05 |
| 118 | Slc46a3  | SLC46A3  | -0.56 | 1.40E-05 | 0.61 | 4.20E-04 | 1.32 | 1.90E-07 |
| 119 | Smpdl3b  | SMPDL3B  | -0.66 | 9.10E-03 | 1.01 | 1.00E-05 | 1.11 | 5.30E-06 |
| 120 | Sqstm1   | SQSTM1   | -0.27 | 7.30E-04 | 0.26 | 7.60E-03 | 0.26 | 7.90E-03 |
| 121 | Srp68    | SRP68    | -0.2  | 2.60E-03 | 0.19 | 2.60E-02 | 0.32 | 7.80E-04 |
| 122 | Ssr4     | SSR4     | -0.43 | 2.30E-04 | 0.35 | 9.00E-05 | 0.24 | 2.70E-03 |
| 123 | St3gal5  | ST3GAL5  | -0.4  | 3.70E-03 | 0.92 | 1.40E-07 | 0.35 | 2.40E-04 |
| 124 | Sytl4    | SYTL4    | -0.42 | 6.50E-03 | 0.49 | 3.70E-05 | 0.28 | 6.10E-03 |
| 125 | Tef      | TEF      | -0.5  | 4.20E-02 | 0.24 | 2.70E-02 | 0.95 | 1.10E-07 |
| 126 | Tlr5     | TLR5     | -0.24 | 1.60E-02 | 1.66 | 4.60E-06 | 1.28 | 8.90E-05 |
| 127 | Tmem109  | TMEM109  | -0.27 | 2.60E-03 | 0.27 | 8.10E-04 | 0.2  | 8.90E-03 |
| 128 | Tmem147  | TMEM147  | -0.22 | 2.40E-03 | 0.43 | 7.40E-06 | 0.27 | 1.00E-03 |
| 129 | Tmem176b | TMEM176B | -0.77 | 1.20E-04 | 0.37 | 8.80E-04 | 0.61 | 9.00E-06 |
| 130 | Tmem87a  | TMEM87A  | -0.13 | 3.60E-02 | 0.81 | 5.90E-07 | 0.19 | 4.90E-02 |
| 131 | Tox3     | TOX3     | -0.58 | 3.40E-02 | 0.63 | 6.50E-03 | 1.36 | 8.30E-06 |
| 132 | Tpd52l1  | TPD52L1  | -0.34 | 3.80E-02 | 0.44 | 2.20E-05 | 0.45 | 2.50E-05 |
| 133 | Trappc1  | TRAPPC1  | -0.14 | 1.60E-02 | 0.47 | 2.10E-04 | 0.43 | 6.00E-04 |
| 134 | Trp53i11 | TP53I11  | -0.51 | 1.80E-03 | 0.64 | 6.20E-06 | 0.25 | 1.90E-02 |
| 135 | Tshz2    | TSHZ2    | -0.57 | 1.00E-03 | 0.45 | 5.60E-03 | 1.4  | 8.20E-08 |
| 136 | Uchl3    | UCHL3    | -0.31 | 9.40E-04 | 0.24 | 1.20E-02 | 0.43 | 1.00E-04 |
| 137 | Uchl4    | UCHL3    | -0.31 | 9.40E-04 | 0.21 | 3.00E-02 | 0.53 | 1.90E-05 |
| 138 | Uck2     | UCK2     | -0.44 | 2.50E-02 | 0.55 | 7.10E-06 | 0.28 | 4.10E-03 |
| 139 | Uqcrc1   | UQCRC1   | -0.2  | 2.00E-02 | 0.19 | 5.50E-03 | 0.27 | 4.60E-04 |
| 140 | Wdr12    | WDR12    | -0.33 | 1.40E-03 | 0.54 | 3.50E-05 | 0.35 | 2.40E-03 |
| 141 | Wdr75    | WDR75    | -0.15 | 3.60E-02 | 0.31 | 4.60E-03 | 0.25 | 2.30E-02 |
| 142 | Yipf1    | YIPF1    | -0.29 | 1.90E-04 | 0.26 | 1.20E-03 | 0.32 | 2.10E-04 |
| 143 | Zmat5    | ZMAT5    | -0.45 | 3.90E-03 | 0.35 | 6.50E-04 | 0.9  | 3.50E-08 |

**Supplemental Table 2. Wnt<sup>low</sup> cells enriched pathways and genes related to epithelial progenitor functions.**

| Pathway                                                  | Set Size | Changed | P.val    | Gene                                                                                                                                                                                                                         | FDR      | -Log10 FDR |
|----------------------------------------------------------|----------|---------|----------|------------------------------------------------------------------------------------------------------------------------------------------------------------------------------------------------------------------------------|----------|------------|
| Epithelial_cell_development                              | 186      | 18      | 8.36E-13 | ATP2B2,CLIC5,HRH2,BMP5,GSTM3,SLC4A5,PTPRS,YIPF6,KLF5,FGFR1,PODXL,SPDEF,SLC9A4,CDK6,VSIG1,RAB25,PALLD,SMO                                                                                                                     | 1.09E-11 | 10.963808  |
| Epithelial_cell_differentiation                          | 495      | 39      | 8.46E-11 | ATP2B2,CDK1,CLIC5,UPK1A,EVPL,HRH2,BMP5,CES1,NFIB,CTSB,UPK1B,SLC7A11,THRB,PLS3,TST,GSTM3,SLC4A5,PTPRS,YIPF6,KLF5,UPK2,GSTK1,FGFR1,AGR2,DMBT1,PODXL,CNN3,ERBB4,SPDEF,SLC9A4,UPK3A,NR2F2,ACVRL1,CDK6,VSIG1,HEY2,RAB25,PALLD,SMO | 8.46E-10 | 9.0726051  |
| Epithelial_cell_fate_commitment                          | 15       | 1       | 0.012479 | NR2F2                                                                                                                                                                                                                        | 0.037437 | 1.4266976  |
| Epithelial_cell_morphogenesis                            | 42       | 5       | 5.08E-08 | HRH2,VSIG1,RAB25,PALLD,SMO                                                                                                                                                                                                   | 4.07E-07 | 6.390773   |
| Epithelial_cell_proliferation                            | 89       | 6       | 3.57E-06 | NRARP,KLK8,MMP14,CCND1,ACVRL1,SHH                                                                                                                                                                                            | 1.78E-05 | 4.7484511  |
| Epithelial_tube_branching_involved_in_lung_morphogenesis | 25       | 2       | 0.000522 | RDH10,SHH                                                                                                                                                                                                                    | 0.002089 | 2.6799801  |
| Intestinal_epithelial_cell_development                   | 11       | 3       | 4.04E-08 | YIPF6,KLF5,SPDEF                                                                                                                                                                                                             | 3.63E-07 | 6.4397194  |
| Intestinal_epithelial_cell_differentiation               | 17       | 3       | 5.60E-07 | YIPF6,KLF5,SPDEF                                                                                                                                                                                                             | 3.92E-06 | 5.4067427  |
| Regulation_of_epithelial_cell_differentiation            | 122      | 8       | 9.06E-07 | PRKCH,AQP3,CCND1,ALOX12,ACVRL1,HEY2,KITLG,SMO                                                                                                                                                                                | 5.44E-06 | 5.2646676  |
| Regulation_of_epithelial_cell_proliferation              | 285      | 24      | 6.71E-12 | CYP7B1,SERPINF1,SULF2,KDR,NRARP,ERBB2,BMP5,NFIB,CCND1,NME1,EAF2,TACR1,WFDC1,SFRP1,ANGPT1,PTPRK,TGFB2,NR2F2,ACVRL1,CDK6,GLUL,TACSTD2,SHH,SMO                                                                                  | 8.05E-11 | 10.094045  |
| Columnar_cuboidal_epithelial_cell_development            | 48       | 9       | 1.02E-14 | ATP2B2,CLIC5,BMP5,YIPF6,KLF5,FGFR1,SPDEF,CDK6,SMO                                                                                                                                                                            | 1.43E-13 | 12.843616  |
| Columnar_cuboidal_epithelial_cell_differentiation        | 111      | 11      | 6.19E-11 | ATP2B2,CLIC5,BMP5,PLS3,YIPF6,KLF5,FGFR1,AGR2,SPDEF,CDK6,SMO                                                                                                                                                                  | 6.81E-10 | 9.1671443  |



**Supplemental Table 3. Wnt<sup>low</sup> cells enriched pathways and genes related to stem cell functions.**

| Pathway                                          | Set Size | Changed | P.val    | Gene                                                                           | FDR      | -Log10 FDR |
|--------------------------------------------------|----------|---------|----------|--------------------------------------------------------------------------------|----------|------------|
| Negative_regulation_of_stem_cell_differentiation | 43       | 3       | 0.00013  | BMP5,SFRP1,TGFB2                                                               | 0.000393 | 3.4060145  |
| Positive_regulation_of_stem_cell_differentiation | 50       | 4       | 7.97E-06 | TCF7L2,TGFB2,SOX5,TACSTD2                                                      | 3.98E-05 | 4.3996156  |
| Positive_regulation_of_stem_cell_proliferation   | 61       | 5       | 1.97E-06 | FGFR1,CX3CL1,KITLG,SHH,SMO                                                     | 1.38E-05 | 4.8609847  |
| Regulation_of_stem_cell_differentiation          | 113      | 7       | 4.13E-06 | BMP5,TCF7L2,SFRP1,TGFB2,SOX5,TACSTD2,SMO                                       | 2.48E-05 | 4.6063113  |
| Regulation_of_stem_cell_population_maintenance   | 17       | 1       | 0.01501  | SMO                                                                            | 0.015007 | 1.8236989  |
| Regulation_of_stem_cell_proliferation            | 88       | 7       | 1.98E-07 | NFIB,ACE,FGFR1,CX3CL1,KITLG,SHH,SMO                                            | 1.58E-06 | 5.8011762  |
| Stem_cell_differentiation                        | 190      | 14      | 8.02E-09 | RDH10,ACE,FGFR1,SFRP1,ERBB4,PSMD11,S100A4,TGFB2,CDK6,SEMA3A,HEY2,KITLG,SHH,SMO | 7.22E-08 | 7.1415693  |
| Stem_cell_division                               | 29       | 3       | 1.24E-05 | FGFR1,TGFB2,SOX5                                                               | 4.94E-05 | 4.3062697  |

**Supplemental Table 4. Wnt<sup>low</sup> cells enriched pathways and genes related to cell cycle.**

| Pathway                                        | Set Size | Changed | P.val    | Gene                                                                                                                                                                                                                                                                                                                                                                                                 | FDR      | -Log10 FDR |
|------------------------------------------------|----------|---------|----------|------------------------------------------------------------------------------------------------------------------------------------------------------------------------------------------------------------------------------------------------------------------------------------------------------------------------------------------------------------------------------------------------------|----------|------------|
| Cell_cycle_g1_s_phase_transition               | 111      | 12      | 2.53E-12 | CCNA1,CDC34,CDK1,CCNE1,E2F6,CCND1,CCNH,EIF4EBP1,DBF4,CDK6,CDKN2C,RHO                                                                                                                                                                                                                                                                                                                                 | 5.81E-11 | 10.235647  |
| Cell_cycle_g2_m_phase_transition               | 138      | 8       | 8.09E-06 | TERF1,AURKA,CDK1,PLK4,CEP70,CCNH,PLCB1,TPD52L1                                                                                                                                                                                                                                                                                                                                                       | 0.000129 | 3.8881704  |
| Cell_cycle_phase_transition                    | 255      | 18      | 9.59E-09 | CCNA1,TERF1,AURKA,CDC34,CDK1,CCNE1,PLK4,CEP70,E2F6,CCND1,CCNH,PLCB1,TPD52L1,EIF4EBP1,DBF4,CDK6,CDKN2C,RHO                                                                                                                                                                                                                                                                                            | 1.82E-07 | 6.7395242  |
| Mitotic_cell_cycle                             | 766      | 49      | 0.00028  | CCNA1,TERF1,AURKA,PSMD3,CDC34,CDK1,CCNE1,PLAGL1,PSMB7,NSUN2,CD2AP,PRDM5,ANAPC13,PSMA4,PSMA1,PLK4,PSMD12,FBXW5,CEP70,PSMB3,E2F6,BECN1,STIL,CCND1,PSMC3,PSMB10,CCNH,PLCB1,TPD52L1,EIF4EBP1,TOP2A,PINX1,CCNG1,PSMB2,DBF4,PSMC1,PSMD11,BRCC3,PSMD14,PSMB4,CDK6,PSMD1,CDKN2C,AAAS,WDR43,RHO,NCAPH,PSMB1,PSMD2                                                                                             | 0.002831 | 2.5481083  |
| Regulation_of_cell_cycle                       | 949      | 65      | 0.00194  | TERF1,RAD51B,AURKA,PSMD3,SGK1,CDK1,SIK1,MYBBP1A,GMNN,CCNE1,PLAGL1,CDKL5,PKHD1,PSMB7,PSMA4,BID,ILK,NUPR1,PSMA1,PLK4,PSMD12,PSMB3,SGSM3,BECN1,CCND1,PSMC3,PSMB10,FNTB,CCNH,MAPK12,TBRG1,PLCB1,CALR,EIF4EBP1,AURKAIP1,ECT2,BTC,TCF7L2,TOP2A,CLIC1,HPGD,TIMP2,FGFR1,SFRP1,CCNG1,PTPRK,PSMB2,NOTCH2,PSMC1,PSMD11,PBX1,PSMD14,PSMB4,TGFB2,NR2F2,CDK6,HTRA2,PSMD1,CDKN2C,PRKAB1,DTL,CKS1B,CAB39,PSMB1,PSMD2 | 0.013612 | 1.8660626  |
| Regulation_of_cell_cycle_g2_m_phase_transition | 59       | 4       | 2.28E-05 | RAD51B,CDK1,CCND1,PBX1                                                                                                                                                                                                                                                                                                                                                                               | 0.000319 | 3.4957808  |
| Regulation_of_cell_cycle_phase_transition      | 321      | 25      | 1.65E-10 | TERF1,RAD51B,AURKA,PSMD3,CDK1,PLAGL1,PSMB7,PSMA4,BID,PSMA1,PSMD12,PSMB3,CCND1,PSMC3,PSMB10,PLCB1,PSMB2,PSMC1,PSMD11,PBX1,PSMD14,PSMB4,PSMD1,PSMB1,PSMD2                                                                                                                                                                                                                                              | 3.63E-09 | 8.4405141  |
| Regulation_of_cell_cycle_process               | 558      | 34      | 1.85E-05 | TERF1,RAD51B,AURKA,PSMD3,CDK1,MYBBP1A,PLAGL1,PKHD1,PSMB7,PSMA4,BID,PSMA1,PLK4,PSMD12,PSMB3,BECN1,CCND1,PSMC3,PSMB10,PLCB1,CALR,AURKAIP1,ECT2,BTC,SFRP1,PSMB2,PSMC1,PSMD11,PBX1,PSMD14,PSMB4,PSMD1,PSMB1,PSMD2                                                                                                                                                                                        | 0.000278 | 3.555805   |
| Regulation_of_mitotic_cell_cycle               | 468      | 32      | 7.84E-08 | TERF1,RAD51B,AURKA,PSMD3,CDK1,SIK1,PLAGL1,PSMB7,PSMA4,BID,PSMA1,PSMD12,PSMB3,BECN1,CCND1,PSMC3,PSMB10,PLCB1,EIF4EBP1,AURKAIP1,BTC,TOP2A,TIMP2,PSMB2,PSMC1,PSMD11,PBX1,PSMD14,PSMB4,PSMD1,PSMB1,PSMD2                                                                                                                                                                                                 | 1.33E-06 | 5.8751059  |

|                                                                               |     |    |          |                                                                                                                                                                                                                                                  |          |           |
|-------------------------------------------------------------------------------|-----|----|----------|--------------------------------------------------------------------------------------------------------------------------------------------------------------------------------------------------------------------------------------------------|----------|-----------|
| Regulation_of_transcription_involved_in_g1_s_transition_of_mitotic_cell_cycle | 27  | 4  | 7.28E-08 | CCNA1,CDK1,CCNE1,E2F6                                                                                                                                                                                                                            | 1.31E-06 | 5.8825438 |
| Cell_proliferation                                                            | 672 | 42 | 9.59E-05 | SERPINF1,RBBP7,SRA1,ZFP36L1,KAT2A,NAA60,PSMG1,NRARP,ILK,ERBB2,LGI1,RASGRF1,MIA,KLK8,MMP14,FES,CLU,GMNC,STIL,CCND1,ACE,RETNLB,PSMB10,REG1B,LRP1,TCF7L2,FGFR1,DDR2,ERBB4,EMP1,TGFB2,ACVRL1,SOX5,HDGF,LIPA,DTYMK,WDR12,GLUL,TACSTD2,CKS1B,KITLG,SHH | 0.001151 | 2.9389534 |
| Negative_regulation_of_epithelial_cell_proliferation                          | 115 | 10 | 1.74E-09 | SERPINF1,NFIB, EAF2,WFDC1,SFRP1,PTPRK,TGFB2,NR2F2,ACVRL1,CDK6                                                                                                                                                                                    | 3.47E-08 | 7.4596525 |
| Positive_regulation_of_epithelial_cell_proliferation                          | 154 | 13 | 3.80E-10 | CYP7B1,KDR,NRARP,ERBB2,BMP5,CCND1,NME1,TACR1,SFRP1,ACVRL1,GLUL,SHH,SMO                                                                                                                                                                           | 7.99E-09 | 8.0976978 |
